# Supplementary material for: Alliin, An Allium sativum Nutraceutical, Reduces Metaflammation Markers in DIO Mice
Source: PubMed Central journal article supplement (PMC7146142; doi:10.3390/nu12030624), 2020-02-27
Supplement: nutrients-12-00624-s001.pdf [file nutrients-12-00624-s001.pdf]

**Supplementary Table S1.** Effect of diet HFD on metabolic tests.

|                       | <b>STD</b>    | <b>HFD</b>    | <b><i>p</i></b> |
|-----------------------|---------------|---------------|-----------------|
| Body weight (gr)      | 28,30 ± 2,077 | 40,52 ± 4,708 | < 0.0001        |
| Triglycerides (mg/dL) | 103,7 ± 21,54 | 162,2 ± 40,76 | < 0.0001        |
| Cholesterol (mg/dL)   | 152,9 ± 2,562 | 159,4 ± 11,28 | < 0.001         |
| Fast glucose (mg/dL)  | 103,5 ± 17,62 | 126,6 ± 16,77 | < 0.0001        |
| AUC of OGTT (a.u.)    | 17023 ± 2872  | 21960 ± 5180  | < 0.001         |
| AUC of ITT (a.u.)     | 8944 ± 1680   | 14381 ± 2950  | < 0.0001        |

The values are expressed as mean ± SD.
